# Supplementary material for: Preoperative Factors Analysis on Root Development after Regenerative Endodontic Procedures: a Retrospective Study of 116 Cases
Source: Research Square preprint supplement (doi:10.21203/rs.3.rs-1753849/v1), 2022-06-22

## Supplementary 1. Figure legends

Figure 1 CBCT measurement of root length, apical foramen size and root thickness preoperatively (A-D) and at the 12-month follow-up (E-H). (A, C, E, G: Sagittal view. B, D, F, H: coronal view)

A, B, E, F: The distance between the CEJ and the apical endpoint was measured distally, mesially, buccally and lingually, which were then averaged as the root length. The size of the apical foramen was averaged from the diameters of the bucco-lingual and mesio-distal directions. (l: preoperative root length, L: root length at 1-year follow-up, w: preoperative apical foramen size, W: apical foramen size at 1-year follow-up).

C, D, G, H: The root thickness was the average value of the thickness at 4 mm (t4, T4), 6 mm (t6, T6) and 8 mm (t8, T8) from the CEJ and from the bucco-lingual and mesio-distal directions. (t: preoperative root thickness, T: root thickness at 1-year follow-up)

Figure

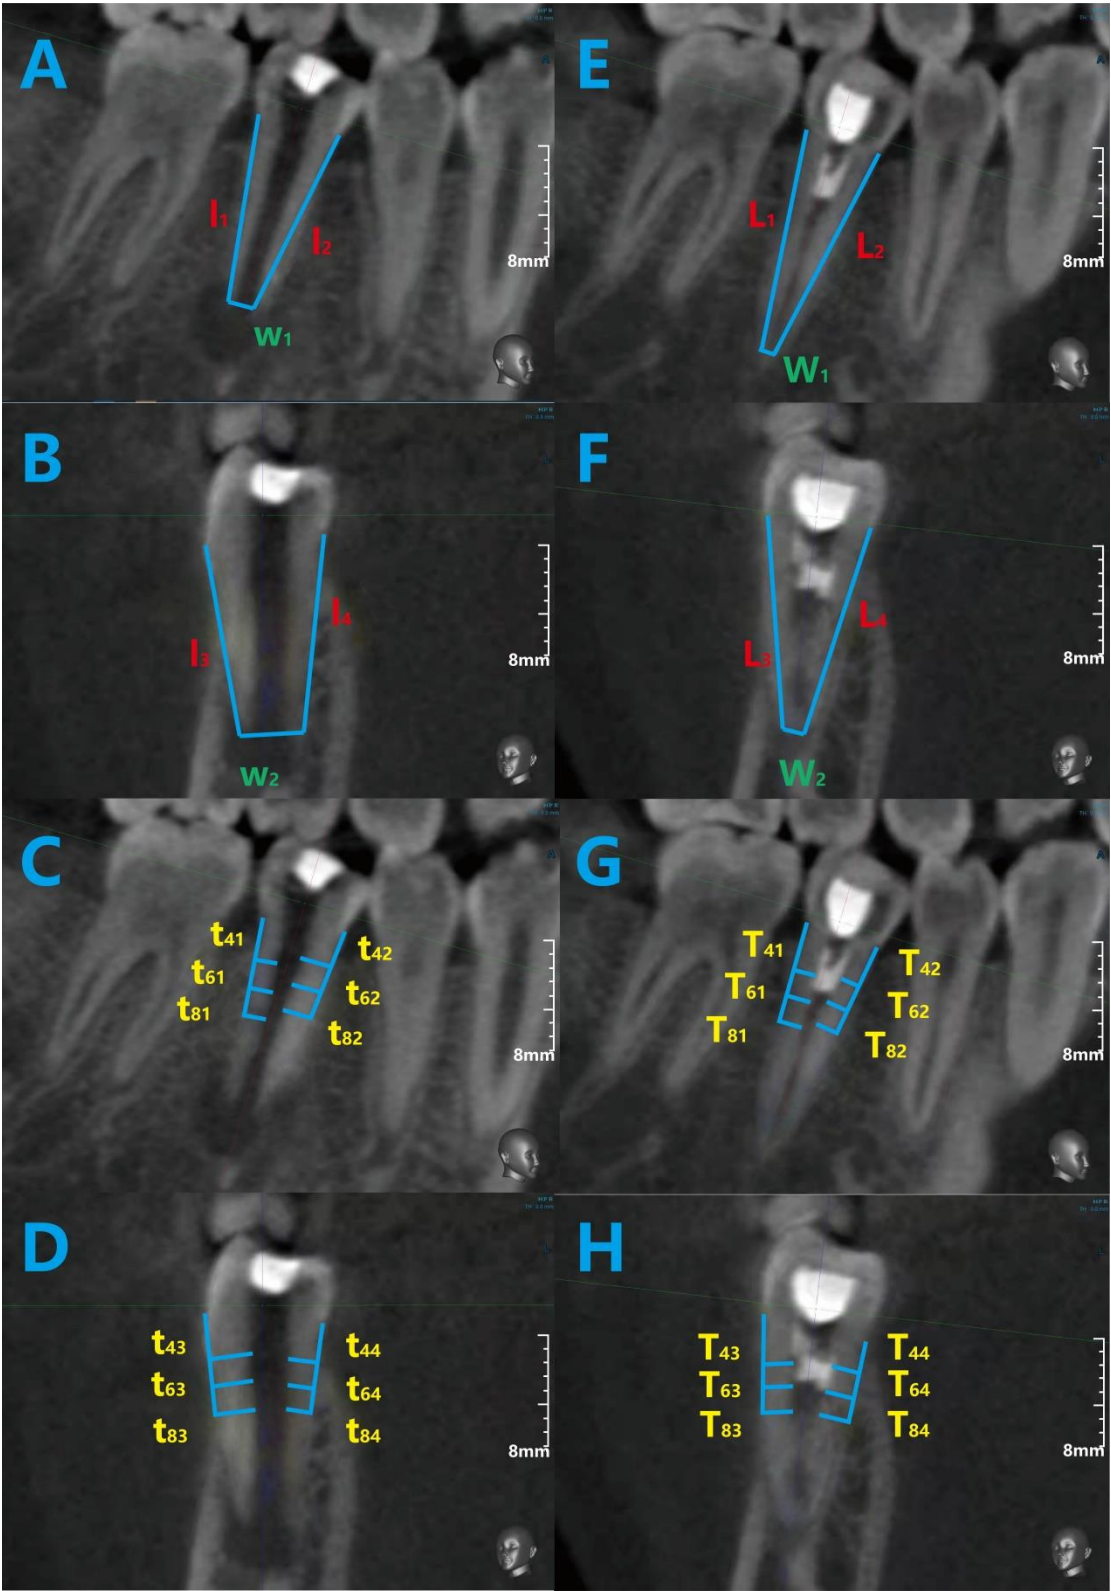

Supplement: Supplementary file [file 7b869a41f03797bb56271f95.pdf]
